# Supplementary material for: Synthesis of liquid crystalline thioether-functionalized hydroxypropyl cellulose esters
Source: Royal Society of Chemistry journal article supplement (doi:10.1039/c4py01709a), 2015-01-01
Supplement: c4py01709a1.pdf [file c4py01709a1.pdf]

# Synthesis of liquid crystalline thioether- functionalized hydroxypropyl cellulose esters

## (Supporting Information)

Peter Ohlendorf and Andreas Greiner\*

Macromolecular Chemistry II and Bayreuth Center for Colloid and Interfaces,  
Universität Bayreuth, Universitätsstraße 30, 95440 Bayreuth, Germany

### Contents

|                                                                      |   |
|----------------------------------------------------------------------|---|
| S1 IR spectrum of HPC-MTP_80 and HPC-MTP_100.....                    | 1 |
| S2 SEC elugram of HPC-MTP_80 and HPC-MTP_100.....                    | 2 |
| S3 TGA of HPC-MTP_80 and HPC-MTP_100.....                            | 2 |
| S4 DSC of HPC-MTP_80 and HPC-MTP_100.....                            | 3 |
| S5 X-ray scattering diffractogram of HPC-MTP_80 and HPC-MTP_100..... | 3 |
| S6 UV/Vis spectrum of HPC-MTP_80 in isotropic melt.....              | 4 |

### S1 IR spectrum of HPC-MTP\_80 and HPC-MTP\_100

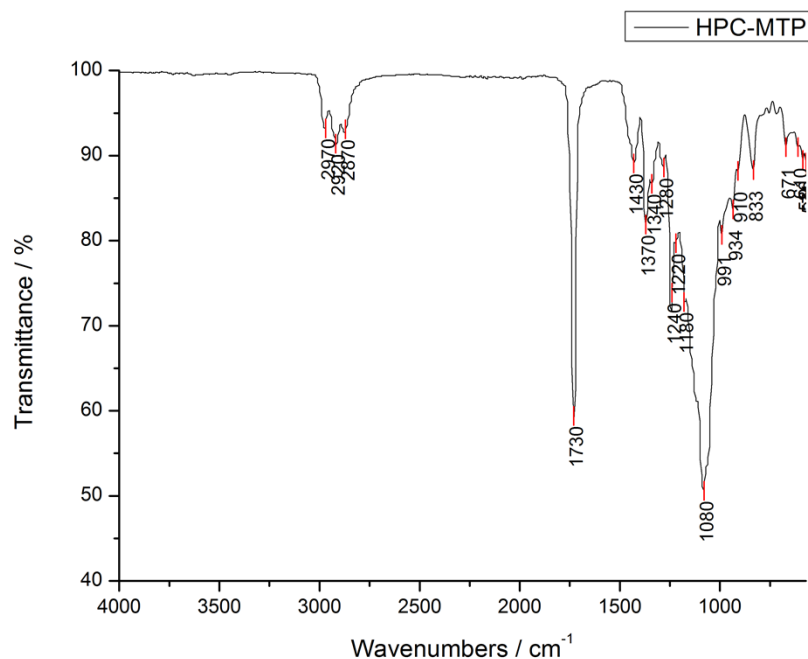

**Figure S1** IR spectrum of HPC-MTP (identical for HPC-MTP\_80 and HPC-MTP\_100)

### S2 SEC elugram of HPC-MTP\_80 and HPC-MTP\_100

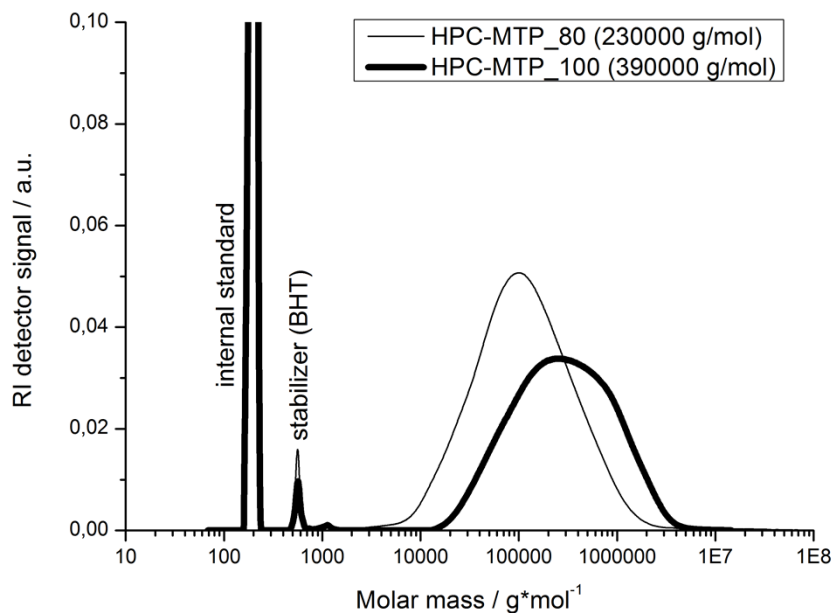

Figure S2 SEC elugram of HPC-MTP\_80 and HPC-MTP\_100 in THF

### S3 TGA of HPC-MTP\_80 and HPC-MTP\_100

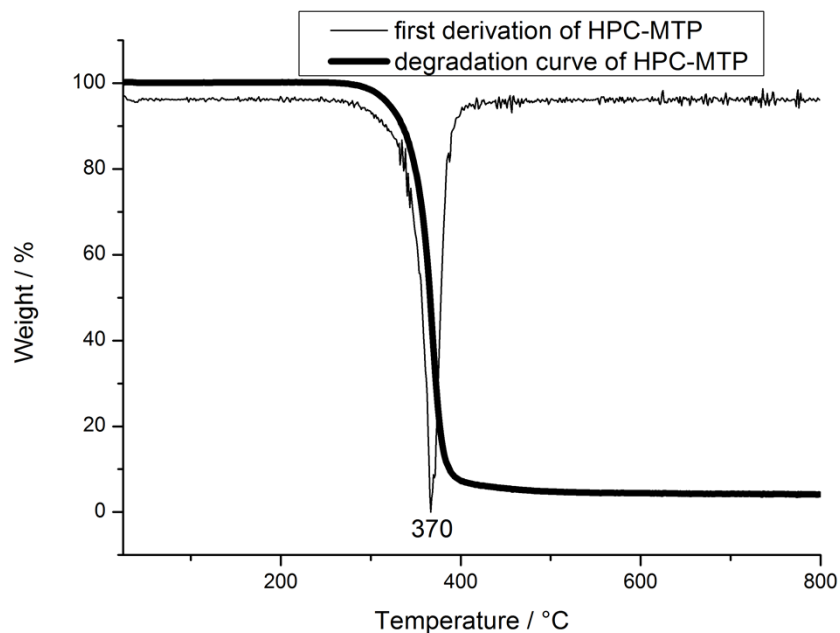

Figure S3 Degradation curve of HPC-MTP with heating rate of 10 °C / min (curves for both products are nearly identical; in terms of clarity only one curve is shown)

#### S4 DSC of HPC-MTP\_80 and HPC-MTP\_100

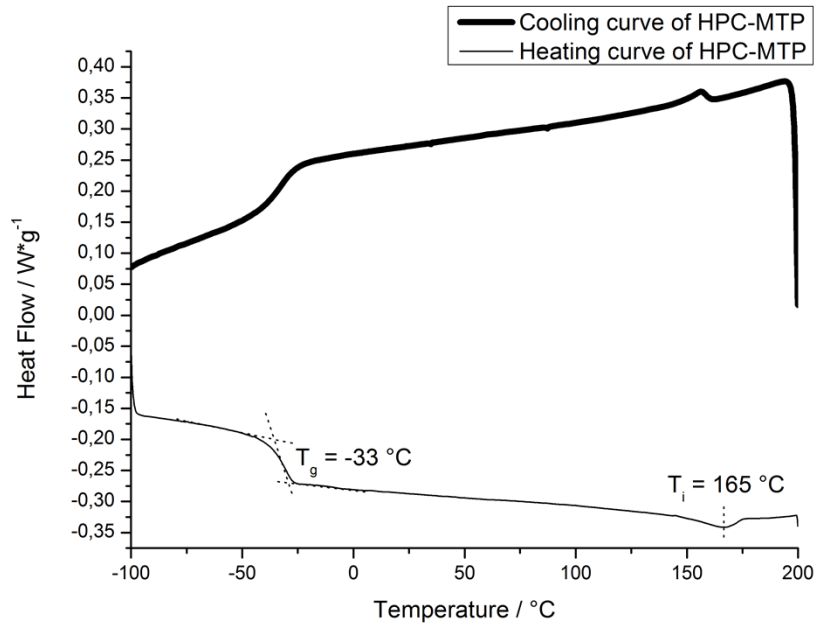

**Figure S4** DSC curve of HPC-MTP; heating and cooling rate 10 °C / min (curves for both products are nearly identical; in terms of clarity only one curve is shown)

#### S5 X-ray scattering diffractogram of HPC-MTP\_80 and HPC-MTP\_100

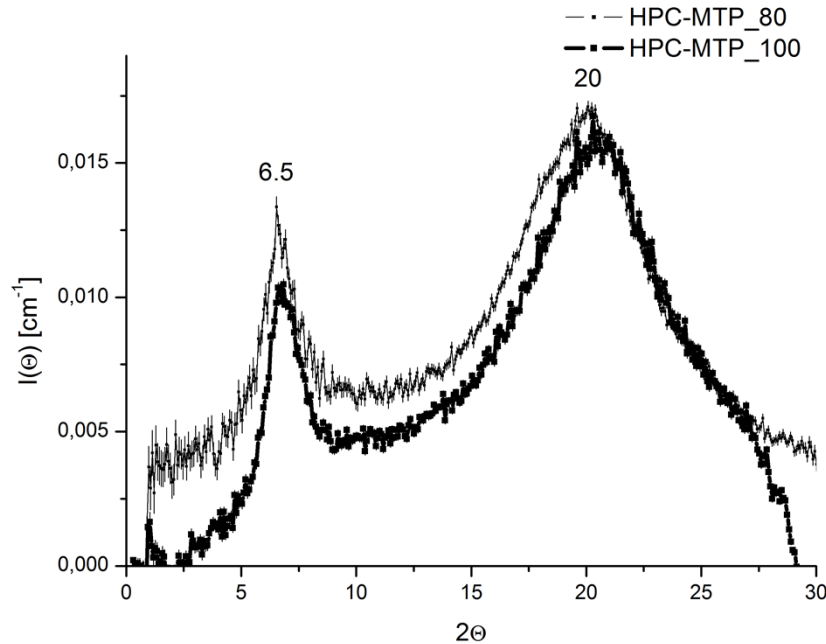

**Figure S5** Wide angle X-ray scattering diffractogram from HPC-MTP products with different chain length at 25 °C

### S6 UV/Vis spectrum of HPC-MTP\_80 in isotropic melt

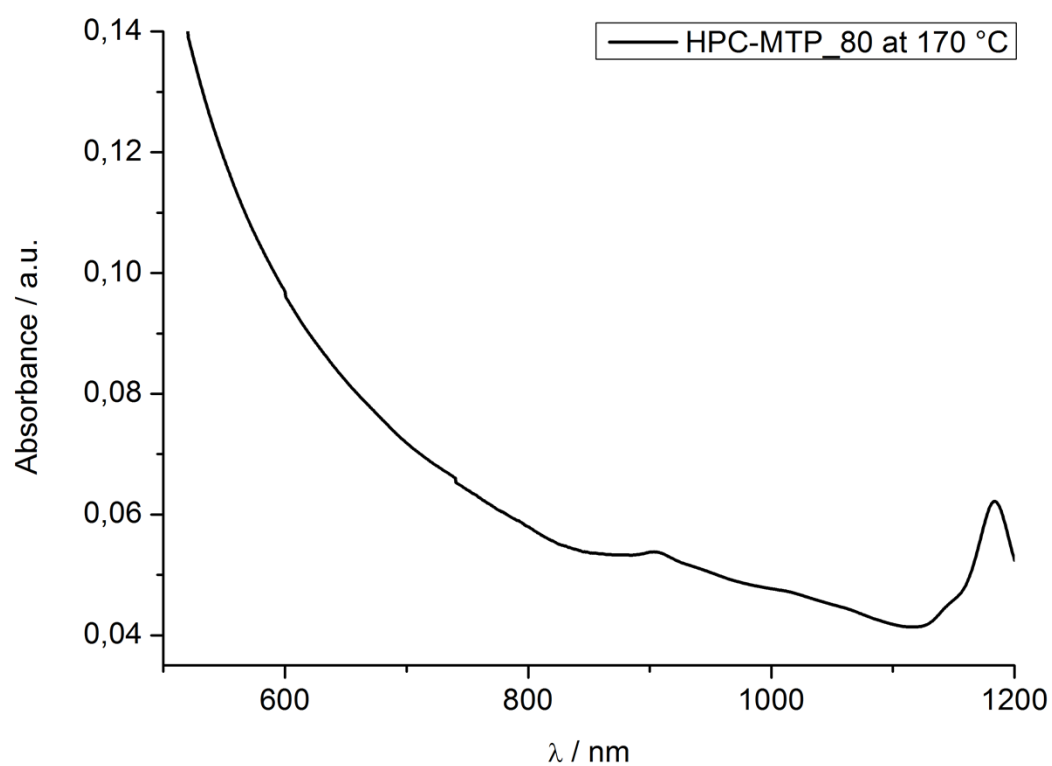

**Figure S6** UV/Vis spectrum of HPC-MTP\_80 at 170 °C (isotropic melt).
